# Supplementary material for: Systematic review of the effectiveness of non-pharmacological interventions used to treat adults with inducible laryngeal obstruction
Source: PubMed Central journal article supplement — BMJ Open Respir Res. 2022 Jun 15;9(1):e001199. doi: 10.1136/bmjresp-2022-001199 (PMC9204450; doi:10.1136/bmjresp-2022-001199), 2022-06-15
Supplement: bmjresp-2022-001199supp001.pdf [file bmjresp-2022-001199supp001.pdf]

## Search strategy

---

1. Vocal Cord Dysfunction/
2. inducible laryngeal obstruction.mp.
3. paradoxical vocal cord\*.mp.
4. paradoxical vocal fold\*.mp.
5. irritable larynx syndrome.mp.
6. laryngeal dysfunction.mp.
7. laryngeal hypersensitivity.mp
8. laryngeal hyper-responsiveness.mp.
9. laryngeal hyperresponsiveness.mp
10. factitious asthma.mp
11. functional laryngeal obstruction.mp.
12. functional upper airway obstruction.mp.
13. psychogenic upper airway obstruction.mp.
14. psychogenic stridor.mp.
15. functional laryngeal stridor.mp.
16. hysterical stridor.mp.
17. laryngeal stridor.mp.
18. laryngeal spasm.mp.
19. vocal cord spasm.mp.
20. late-onset laryngomalacia.mp
21. adult laryngomalacia.mp.
22. functional laryngeal dyskinesia.mp.
23. episodic laryngeal dyskinesia.mp.
24. exercise induced laryngeal\*.mp.
25. exercise induced dyspnea.mp.
26. exercise-induced stridor.mp.
27. 1 or 2 or 3 or 4 or 5 or 6 or 7 or 8 or 9 or 10 or 11 or 12 or 13 or 14 or 15 or 16 or 17 or 18 or 19 or 20 or 21 or 22 or 23 or 24 or 25 or 26
28. Non-pharmacological.mp.
29. Therap\*.mp.
30. Intervene\*.mp.

31. Program\*.mp.
32. Train\*.mp.
33. re-train\*.mp.
34. Exercise\*.mp.
35. Rehabilit\*.mp.
36. (Speech\* or language\* or pathol\*).mp.
37. Physiotherap\*.mp.
38. behaviour\*.mp
39. cognitive\*.mp.
40. psycho\*.mp.
41. 28 or 29 or 30 or 31 or 32 or 33 or 34 or 35 or 36 or 37 or 38 or 39 or 40
42. 27 and 41
43. limit 42 to english language
