# Supplementary material for: Systematic review of the effectiveness of non-pharmacological interventions used to treat adults with inducible laryngeal obstruction
Source: PubMed Central journal article supplement — BMJ Open Respir Res. 2022 Jun 15;9(1):e001199. doi: 10.1136/bmjresp-2022-001199 (PMC9204450; doi:10.1136/bmjresp-2022-001199), 2022-06-15
Supplement: bmjresp-2022-001199supp002.pdf [file bmjresp-2022-001199supp002.pdf]

**Pre-defined inclusion/exclusion screening checklist**

- Include for full text review if all 7 screening questions answered 'YES' or 'UNSURE'
- Exclude article if at least one screening question answers 'NO'
- Apply hierarchical ordering of abstract screening questions – as soon as 'NO' answered, exclude and stop screening.

|                     |                                                                                                                                           | YES | UNSURE | NO |
|---------------------|-------------------------------------------------------------------------------------------------------------------------------------------|-----|--------|----|
| <b>Study</b>        |                                                                                                                                           |     |        |    |
| 1                   | Does the title & abstract use English?                                                                                                    |     |        |    |
| 2                   | Does the title & abstract indicate the publication is NOT an expert opinion paper or review?                                              |     |        |    |
| <b>Population</b>   |                                                                                                                                           |     |        |    |
| 3                   | Are the study participants >16 years of age?                                                                                              |     |        |    |
| 4                   | Have the study participants received a diagnosis of ILO?                                                                                  |     |        |    |
| 5                   | Has the diagnosis of ILO been given based on direct laryngeal imaging (i.e laryngoscopy or scanning) or via the Pittsburgh questionnaire? |     |        |    |
| <b>Intervention</b> |                                                                                                                                           |     |        |    |
| 6                   | Have the participants received non-pharmacological intervention(s) to treat ILO symptoms?                                                 |     |        |    |
| <b>Outcome</b>      |                                                                                                                                           |     |        |    |
| 7                   | Are reported outcomes specific to ILO? (e.g. symptoms, direct visualisation, healthcare utilisation)                                      |     |        |    |
