# Supplementary material for: Systematic review of the effectiveness of non-pharmacological interventions used to treat adults with inducible laryngeal obstruction
Source: PubMed Central journal article supplement — BMJ Open Respir Res. 2022 Jun 15;9(1):e001199. doi: 10.1136/bmjresp-2022-001199 (PMC9204450; doi:10.1136/bmjresp-2022-001199), 2022-06-15
Supplement: bmjresp-2022-001199supp003.pdf [file bmjresp-2022-001199supp003.pdf]

**Supplementary table: Key characteristics of included studies, in alphabetical order**

*Legend:* \* Subgroup of a larger population; \*\* Not reported, communication with author; \*\*\*combined calculation, based on reported data

*Abbreviations:* *Ref* reference; *SD* standard deviation; *ACQ* Asthma control questionnaire; *ACT* Asthma control test; *SLT* Speech and language therapy; *VCDQ* Vocal cord dysfunction questionnaire; *ILO* Inducible laryngeal obstruction; *CT* Computerised tomography; *GP* General practice; *ED* Emergency department; *DI* Dyspnea Index Questionnaire; *RTMV* Respiratory tidal minute volume; *HR* heart rate; *ETCO<sub>2</sub>* End tidal carbon dioxide; *NR* not reported; *NB* note well; *D12* Dyspnoea 12; *HAD* Hospital Anxiety and Depression Scale; *6MWT* six-minute walk test; *AQLQ* Asthma quality of life questionnaire; *MIP* maximal inspiratory muscle strength; *COPD* Chronic obstructive pulmonary disease; *EMG* electromyography

| Study (Ref)             | Study design and setting                                                          | Sample size | Population demographics<br>[% female; mean (SD) age years, unless specified] | Intervention (as named by study authors) | Outcome measure(s)                                                                      | Key findings                                                                                                                                                                                                                                                            |
|-------------------------|-----------------------------------------------------------------------------------|-------------|------------------------------------------------------------------------------|------------------------------------------|-----------------------------------------------------------------------------------------|-------------------------------------------------------------------------------------------------------------------------------------------------------------------------------------------------------------------------------------------------------------------------|
| Baxter et al, 2019 [34] | Observational (non-randomised uncontrolled before-after), hospital clinic setting | 56*         | 74% female, age 60.29 (13.12) years                                          | Laryngeal retraining therapy             | Validated questionnaires (ACQ; ACT; Nimegen); laryngeal imaging; healthcare utilisation | <ul style="list-style-type: none"> <li>No significant improvement in questionnaire data [mean(SD) ACQ 2.50 (1.32) pre intervention, 2.05 (1.14) post, p=0.19; mean(SD) ACT 13.21 (4.73) pre intervention, 14.69 (4.94) post, p=0.28; mean(SD) Nijmegen 28.04</li> </ul> |

(11.88) pre intervention, 26.73

(12.17) post, p=0.68]

- Mixed outcome in laryngeal imaging [laryngoscopy ILO present in 72% pre intervention, 60% post, p=0.98; CT ILO present in 38% pre intervention, 11% post, p=0.02. *NB un-blinded assessment*]
- Significant reduction in visits to healthcare settings [GP visits mean (SD) 12 months pre intervention 10.17 (9.09), 12 months post intervention 5.26(5.36), p<0.001; ED/hospital admission mean (SD) 12 months pre intervention 4.20 (4.66), 12 months post intervention 2.40(5.53), p=0.001]

|                                    |                                                                           |    |                                       |     |      |                                                                                            |
|------------------------------------|---------------------------------------------------------------------------|----|---------------------------------------|-----|------|--------------------------------------------------------------------------------------------|
| Haines et al, 2016 [35] (Abstract) | Observational (non-randomised uncontrolled before-after), hospital clinic | 16 | 69% female**, age 47.2 (14.5) years** | SLT | VCDQ | Improvement in VCDQ from median (range) 46 (20-60) pre SLT to 38 (12-15) post SLT, p=0.017 |
|------------------------------------|---------------------------------------------------------------------------|----|---------------------------------------|-----|------|--------------------------------------------------------------------------------------------|

## setting

|                           |                                                                                   |    |                                                       |                             |                                                                                         |                                                                                                                                                                                                                                                                                                                                                           |
|---------------------------|-----------------------------------------------------------------------------------|----|-------------------------------------------------------|-----------------------------|-----------------------------------------------------------------------------------------|-----------------------------------------------------------------------------------------------------------------------------------------------------------------------------------------------------------------------------------------------------------------------------------------------------------------------------------------------------------|
| Halevi-Katz, 2019 [36]    | Observational (non-randomised uncontrolled before-after), hospital clinic setting | 12 | 92% female, age 28 (16) years<br>Exercise-induced ILO | Buteyko Breathing Technique | DI; RTMV; HR; ETCO <sub>2</sub>                                                         | <ul style="list-style-type: none"> <li>Significant improvements in DI [<math>\chi^2(3) = 18.741, p &lt; 0.001</math>], RTMV [<math>\chi^2(3) = 9.480, p = 0.024</math>], ETCO<sub>2</sub> [<math>\chi^2(3) = 8.657, p = 0.034</math>] over time</li> <li>No improvement (decrease) in HR over time [<math>\chi^2(3) = 2.844, p = 0.024</math>]</li> </ul> |
| Hatzelis et al, 2012 [37] | Case report, hospital clinic setting                                              | 1  | Female, age 23 years                                  | Respiratory retraining      | Laryngoscopy; In-house patient reported severity rating scale for breathing difficulty  | Laryngoscopy pre intervention = >50% vocal fold adduction, end of/one-month post/three month post intervention = <50% vocal fold adduction; severity rating reduce from 4.5 pre intervention to 1 one-year post intervention (where 5 maximum severity)                                                                                                   |
| Kramer et al, 2017 [33]   | Observational (non-randomised controlled before-after), hospital clinic           | 66 | 85% female, age median (range NR) 42 years            | Laryngeal control therapy   | In-house asthma medication score; patient reported symptom improvement (polar question) | <ul style="list-style-type: none"> <li>Significant reduction in asthma medication score [mean 4.85 pre intervention, 2.40 post, <math>p &lt; 0.001</math>]</li> <li>No significant difference in reduction of asthma medication</li> </ul>                                                                                                                |

setting

score between no therapy and therapy groups (mean 3.44, 2.60, 2.68, p=0.71)

- No significant difference in reported improved symptoms between therapy and no therapy groups (87% vs 66%, p=0.17)

|                                     |                                                                                   |     |                                                                             |                             |                                                                                                                                            |                                                                                                                                                                                                                                                                                                                                     |
|-------------------------------------|-----------------------------------------------------------------------------------|-----|-----------------------------------------------------------------------------|-----------------------------|--------------------------------------------------------------------------------------------------------------------------------------------|-------------------------------------------------------------------------------------------------------------------------------------------------------------------------------------------------------------------------------------------------------------------------------------------------------------------------------------|
| Marcinow et al, 2015 [18]           | Observational (non-randomised uncontrolled before-after), hospital clinic setting | 34* | 91% female, age median (range) 46 (27-73) years<br><br>Irritant-induced ILO | Laryngeal control therapy   | Patient reported level of improved dyspnoea symptoms (none, partial, complete)                                                             | Reduction and elimination of dyspnoea symptoms reported in 29% after 1 intervention session and in 100% after ≥ 2 intervention sessions<br><i>(NB. no statistical analysis or p values reported)</i>                                                                                                                                |
| Mathers-Schmidt & Brilla, 2005 [22] | Case report, hospital clinic setting                                              | 1   | Female, age 18 years<br><br>Exercise-induced ILO                            | Inspiratory muscle training | MIP; In-house patient reported 4-point severity rating scale for dyspnoea; physiological measures of maximal exercise effort; laryngoscopy | <ul style="list-style-type: none"> <li>• MIP improved 77% after intervention phases, mean (SD) increase of 120.7 (0.9) cm H<sub>2</sub>O</li> <li>• Severity rating decreased from 2.5 pre intervention, to 1.3 post</li> <li>• Pre intervention laryngoscopy abnormal adduction of vocal cords during inspiration, post</li> </ul> |

|                        |                                                                                   |    |                                                |                        |                                                                                                                                                                                                                           |                                                                                                                                                                                                                                                                                                                                                                                                                                                                                                                     |
|------------------------|-----------------------------------------------------------------------------------|----|------------------------------------------------|------------------------|---------------------------------------------------------------------------------------------------------------------------------------------------------------------------------------------------------------------------|---------------------------------------------------------------------------------------------------------------------------------------------------------------------------------------------------------------------------------------------------------------------------------------------------------------------------------------------------------------------------------------------------------------------------------------------------------------------------------------------------------------------|
|                        |                                                                                   |    |                                                |                        |                                                                                                                                                                                                                           | <p>laryngoscopy normal examination</p> <ul style="list-style-type: none"> <li>Minimal changes in physiological measures pre post intervention</li> </ul>                                                                                                                                                                                                                                                                                                                                                            |
| Murry et al, 2010 [38] | Observational (non-randomised uncontrolled before-after), hospital clinic setting | 16 | Gender demographic NR, age (range) 29-69 years | Respiratory retraining | RSI; RSI-7 (question 7 only troublesome of annoying cough); laryngoscopy for ILO assessment; laryngoscopy with sensory testing; patient reported symptom presence (polar question) for cough, throat clearing, hoarseness | <p>(NB. reported results in figure and text contradictory)</p> <ul style="list-style-type: none"> <li>Significant reduction in laryngeal sensory response, RSI-7 (n=12) and patient reported symptoms of cough, throat clearing and hoarseness, pre and post intervention, <math>p &lt; 0.01</math> (mean/SD NR)</li> <li>19% improved/75% resolved ILO on pre and post intervention laryngoscopy</li> <li>No significant reduction in overall RSI scores pre and post intervention (p value/mean/SD NR)</li> </ul> |
| Nacci et al, 2011 [39] | Observational (non-randomised uncontrolled before-after),                         | 20 | 80% female***, age 44.2 (9.6) years***         | Respiratory retraining | In-house patient reported dyspnoea severity rating scale; number of dyspnoeic episodes in last month                                                                                                                      | <ul style="list-style-type: none"> <li>Significant improvements in severity scores and reduced number of episodes pre and post intervention, regardless of the</li> </ul>                                                                                                                                                                                                                                                                                                                                           |

|                                         |                                                                                   |     |                                               |                                                            |                                                                 |                                                                                                                                                                                                                                                          |
|-----------------------------------------|-----------------------------------------------------------------------------------|-----|-----------------------------------------------|------------------------------------------------------------|-----------------------------------------------------------------|----------------------------------------------------------------------------------------------------------------------------------------------------------------------------------------------------------------------------------------------------------|
|                                         | hospital clinic setting                                                           |     |                                               |                                                            |                                                                 | number of intervention cycles received, p<0.01                                                                                                                                                                                                           |
|                                         |                                                                                   |     |                                               |                                                            |                                                                 | <ul style="list-style-type: none"> <li>Greater significant difference in both severity scores and reduced number of episodes between those receiving 9 cycles of intervention compared to those receiving 3 cycles of intervention, p&lt;0.01</li> </ul> |
| Olley et al, 2013 [40] (Abstract)       | Observational (non-randomised uncontrolled before-after), hospital clinic setting | 8   | Gender demographic NR, age 38.3(21.1) years   | Physiotherapy delivered breathing and laryngeal retraining | D12; HAD; 6MWT;AQLQ                                             | <p>(NB. reported results for n=4)</p> <ul style="list-style-type: none"> <li>Improvements in quality of life measures (D12 &amp; AQLQ) and exercise capacity (6MWT), reported as clinically significant but p values NR</li> </ul>                       |
| Pargeter & Mansur, 2016 [41] (Abstract) | Observational (non-randomised uncontrolled before-after), hospital clinic setting | 249 | 80% female, mean (range) age 45 (24-77) years | SLT                                                        | In-house patient reported ILO questionnaire; hospital admission | Mean (SD) patient reported ILO questionnaire improved pre intervention 15.57 (3.96) to post intervention 7.75 , p<0.0001; mean (SD, range) hospital admissions 12 months reduced pre intervention 2.44 (4.84, 0-31) to 12 months post                    |

| intervention 0.31 (1.01, 0-7), p<0.0001 |                                                                                   |    |                                                                           |                           |                                                                                                      |                                                                                                                                                                                                                       |
|-----------------------------------------|-----------------------------------------------------------------------------------|----|---------------------------------------------------------------------------|---------------------------|------------------------------------------------------------------------------------------------------|-----------------------------------------------------------------------------------------------------------------------------------------------------------------------------------------------------------------------|
| Pinho et al, 1997 [42]                  | Case report, hospital clinic setting                                              | 1  | Male, age 36 years                                                        | SLT                       | Laryngoscopy                                                                                         | Pre intervention severe supraglottic obstruction during respiration, post intervention normal abduction during respiration                                                                                            |
| Shin et al, 2018 [43] (Abstract)        | Observational (non-randomised uncontrolled before-after), hospital clinic setting | 46 | Gender demographic NR, median (range NR) age 54 years<br><br>ILO and COPD | Laryngeal control therapy | Patient reported level of symptoms (improvements, no, worsening)                                     | 50% of population reported improved symptoms, 22% no or worsening symptoms, 28% lost to follow-up                                                                                                                     |
| Warnes et al, 2005 [44]                 | Case report, hospital clinic setting                                              | 1  | Female, age 16 years                                                      | EMG biofeedback           | µV criterion level; ILO pain visual analogue scale (0-10); adaptive functioning severity scale (0-6) | <ul style="list-style-type: none"> <li>Laryngeal muscle tension levels reduce by 60% post intervention, no pain reported after intervention 6, post intervention no interference of ILO in day to day life</li> </ul> |
