# Supplementary material for: Systematic review of the effectiveness of non-pharmacological interventions used to treat adults with inducible laryngeal obstruction
Source: PubMed Central journal article supplement — BMJ Open Respir Res. 2022 Jun 15;9(1):e001199. doi: 10.1136/bmjresp-2022-001199 (PMC9204450; doi:10.1136/bmjresp-2022-001199), 2022-06-15
Supplement: bmjresp-2022-001199supp004.pdf [file bmjresp-2022-001199supp004.pdf]

## Joanna Briggs Institute Critical Appraisal Checklist and risk of bias

© JBI, 2020. All rights reserved. JBI grants use of these Critical Appraisal tools for research purposes only. All other enquiries should be sent to [jbisynthesis@adelaide.edu.au](mailto:jbisynthesis@adelaide.edu.au).

### ***Joanna Briggs Institute critical appraisal checklist for quasi-experimental studies; quality and risk of bias of included studies***

*Legend: JBI: Joanna Briggs Institute; NA Not applicable; \* Observational study without a control group; 2.d^ Retrospective control group study*

| Question (yes, no, unclear)                                    | Study; JBI Level of evidence |                     |                    |                     |                       |                    |                    |                    |                          |                     |                   |
|----------------------------------------------------------------|------------------------------|---------------------|--------------------|---------------------|-----------------------|--------------------|--------------------|--------------------|--------------------------|---------------------|-------------------|
|                                                                | Baxter et al, 2019;          | Haines et al, 2016; | Halevi-Katz, 2019; | Kramer et al, 2017; | Marcinow et al, 2015; | Murry et al, 2010; | Nacci et al, 2011; | Olley et al, 2013; | Pargeter & Mansur, 2016; | Sandes et al, 2019; | Shin et al, 2018; |
|                                                                | Level 3.e*                   | Level 3.e*          | Level 3.e*         | Level 2.d^          | Level 3.e*            | Level 3.e*         | Level 3.e*         | Level 3.e*         | Level 3.e*               | Level 3.e*          | Level 3.e*        |
| Clear cause & effect                                           | YES                          | YES                 | YES                | UNCLEAR             | YES                   | YES                | YES                | YES                | YES                      | YES                 | YES               |
| Participants included in any comparisons similar               | YES                          | YES                 | YES                | UNCLEAR             | YES                   | YES                | YES                | YES                | YES                      | YES                 | YES               |
| Participants included in any comparisons received similar care | NA                           | NA                  | NA                 | UNCLEAR             | NA                    | NA                 | UNCLEAR            | NA                 | NA                       | NA                  | NA                |
| Control group                                                  | NO                           | NO                  | NO                 | YES                 | NO                    | NO                 | NO                 | NO                 | NO                       | NO                  | NO                |

|                                                          |          |          |          |          |          |          |          |          |          |          |          |
|----------------------------------------------------------|----------|----------|----------|----------|----------|----------|----------|----------|----------|----------|----------|
| Multiple measures of outcome, both pre/post intervention | NO       | NO       | YES      | NO       | NO       | NO       | YES      | NO       | NO       | UNCLEAR  | UNCLEAR  |
| Complete follow up, any differences described & analysed | NA       | NA       | NA       | NO       | NA       | NA       | YES      | NA       | NA       | NA       | NA       |
| Outcomes of participants recorded in same way            | NA       | NA       | NA       | YES      | NA       | NA       | YES      | NA       | NA       | NA       | NA       |
| Outcomes reliably measured                               | UNCLEAR  | UNCLEAR  | UNCLEAR  | NO       | NO       | NO       | NO       | UNCLEAR  | UNCLEAR  | UNCLEAR  | UNCLEAR  |
| Appropriate statistical analysis used                    | NO       | YES      | YES      | YES      | NO       | UNCLEAR  | YES      | NO       | UNCLEAR  | UNCLEAR  | UNCLEAR  |
| <b>TOTAL</b>                                             | <b>2</b> | <b>3</b> | <b>4</b> | <b>3</b> | <b>2</b> | <b>2</b> | <b>6</b> | <b>2</b> | <b>2</b> | <b>2</b> | <b>2</b> |

**Joanna Briggs Institute critical appraisal checklist for case reports; quality and risk of bias of included studies***Legend: JBI: Joanna Briggs Institute; NA Not applicable; 4.d<sup>x</sup> Case report***Study; JBI Level of evidence**

|                                                              | Hatzelis et al, 2012;<br>Level 4.d <sup>x</sup> | Mathers-Schmidt & Brilla,<br>2005;<br>Level 4.d <sup>x</sup> | Pinho et al, 1997;<br>Level 4.d <sup>x</sup> | Warnes et al, 2005;<br>Level 4.d <sup>x</sup> |
|--------------------------------------------------------------|-------------------------------------------------|--------------------------------------------------------------|----------------------------------------------|-----------------------------------------------|
| Participant characteristics clearly described                | NO                                              | NO                                                           | NO                                           | NO                                            |
| Clear history presented as a timeline                        | YES                                             | NO                                                           | YES                                          | NO                                            |
| Current clinical condition on presentation clearly described | YES                                             | NO                                                           | YES                                          | NO                                            |
| Diagnostic tests/assessment methods clearly described        | YES                                             | YES                                                          | YES                                          | NO                                            |
| Intervention clearly described                               | YES                                             | YES                                                          | YES                                          | YES                                           |
| Post-interventional clinical condition clearly described     | YES                                             | YES                                                          | YES                                          | YES                                           |
| Adverse/unanticipated events identified and described        | NO                                              | NO                                                           | YES                                          | NO                                            |
| Take-away lessons provided                                   | YES                                             | YES                                                          | YES                                          | YES                                           |
| <b>TOTAL</b>                                                 | <b>6</b>                                        | <b>3</b>                                                     | <b>7</b>                                     | <b>3</b>                                      |

**Question (yes, no, unclear)**
